# Supplementary material
Source: HighWire-hosted journal article supplement (https://www.cfp.ca/highwire/filestream/30393/field_highwire_adjunct_files/1/CC_Fig2.pdf)
Supplement: CC_Fig2.pdf [file CC_Fig2.pdf]

**Figure 2.** Mean atmospheric carbon dioxide at Mauna Loa Observatory in Hawaii for February 2012: *Carbon dioxide data (red curve), measured as the mole fraction in dry air, on Mauna Loa constitute the longest record of direct measurements of carbon dioxide in the atmosphere; the black curve represents the seasonally corrected data.*

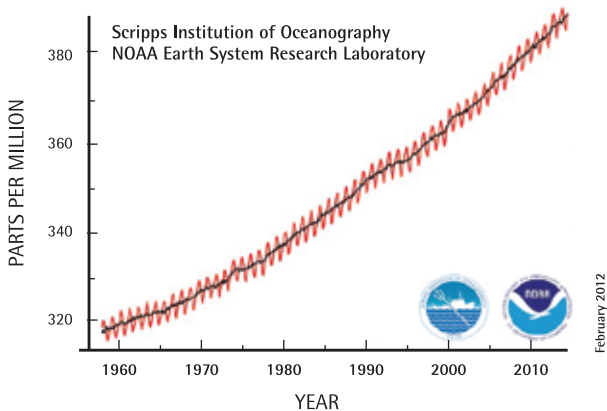

Reprinted from National Oceanic and Atmospheric Administration, Earth System Research Laboratory.<sup>8</sup>
